# Supplementary material for: Malaria's Missing Number: Calculating the Human Component of R0 by a Within-Host Mechanistic Model of Plasmodium falciparum Infection and Transmission
Source: PLOS journal article supplement (doi:10.1371/journal.pcbi.1003025), 2013-04-18
Supplement: S4 (10.1371/journal.pcbi.1003025.s004) [file journal.pcbi.1003025.s004]

Figure S1

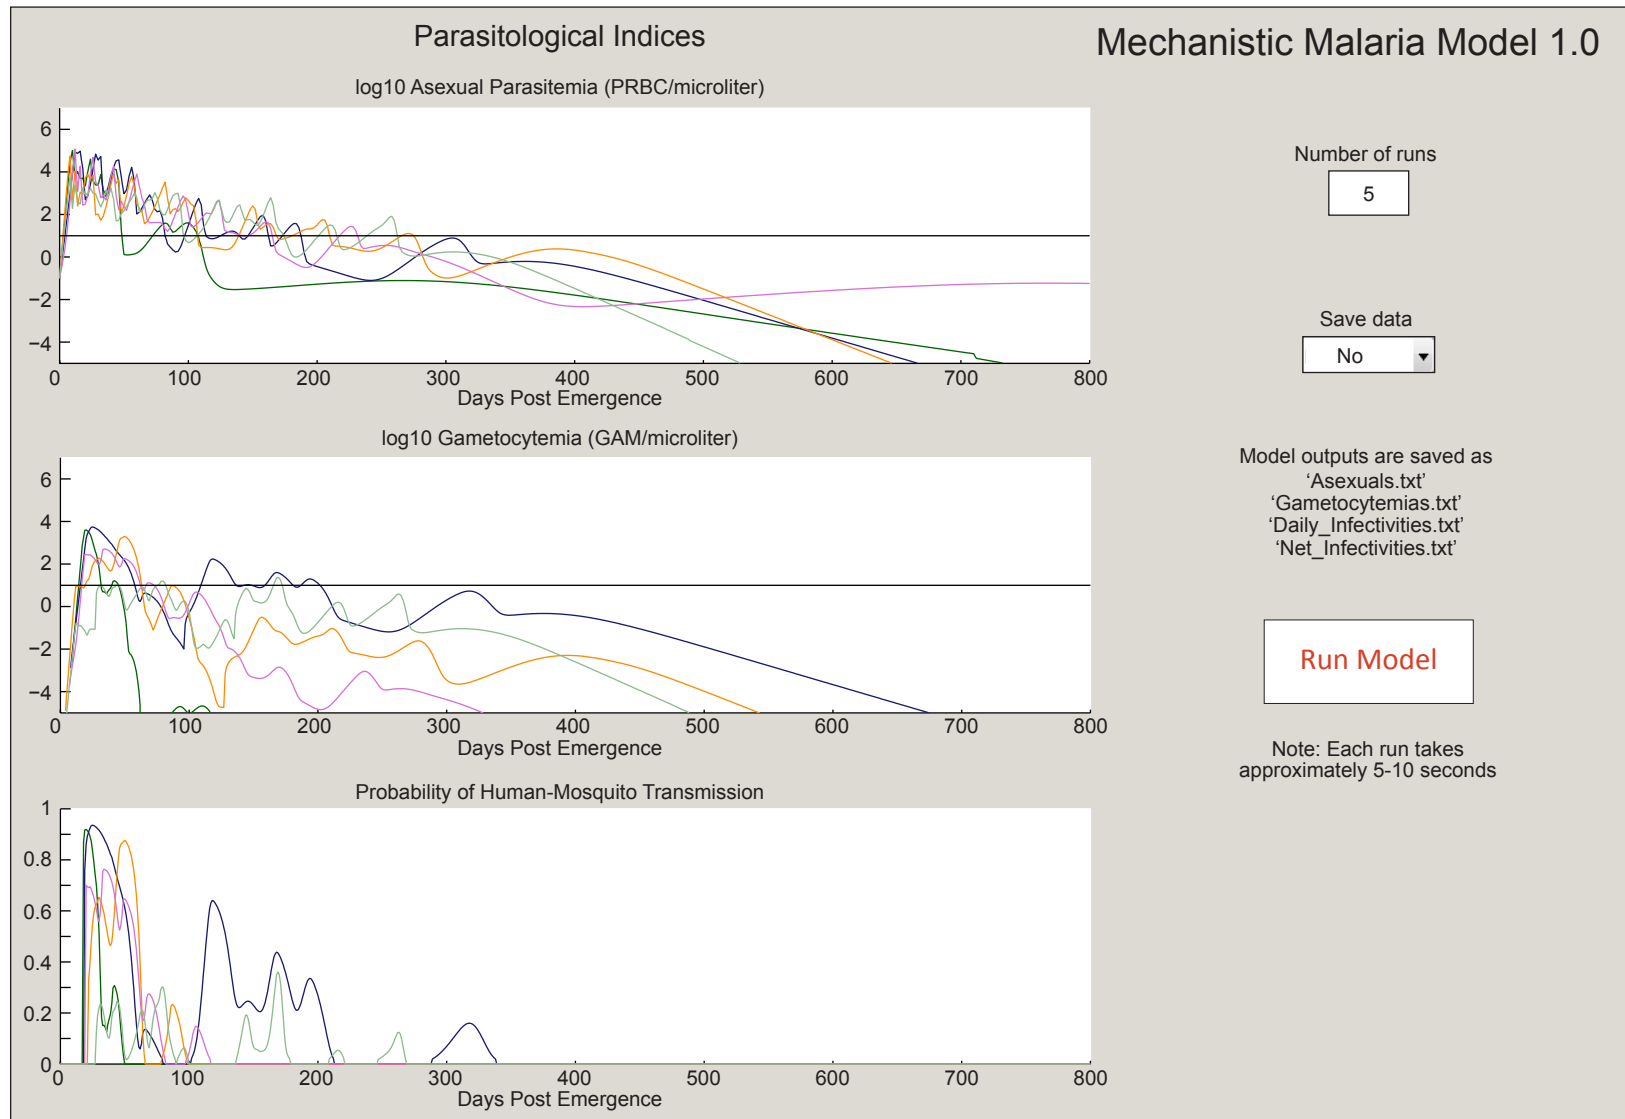

Graphical user interface for standalone model software. User manuals for PC and Mac are provided as Supplemental Text S1. Model files are also included.
