# Supplementary material for: Malaria's Missing Number: Calculating the Human Component of R0 by a Within-Host Mechanistic Model of Plasmodium falciparum Infection and Transmission
Source: PLOS journal article supplement (doi:10.1371/journal.pcbi.1003025), 2013-04-18
Supplement: S5 (10.1371/journal.pcbi.1003025.s005) [file journal.pcbi.1003025.s005]

301 Moved Permanently

# Moved Permanently

The document has moved here.

---

Apache Server at www.ploscompbiol.org Port 80
